# Supplementary material for: An accurate cost effective DFT approach to study the sensing behaviour of polypyrrole towards nitrate ions in gas and aqueous phases
Source: Royal Society of Chemistry journal article supplement (doi:10.1039/c6cp02271e), 2016-01-01
Supplement: c6cp02271e1.pdf [file c6cp02271e1.pdf]

## **An accurate cost effective DFT approach to study sensor behaviour of polypyrrole for nitrate ion in gas and aqueous phase**

Fatima Wasim, Tariq Mahmood, Khurshid Ayub,\*

Department of Chemistry, COMSATS Institute of Information Technology, Abbottabad

## Supporting Information

Table S1. Optimized Geometric parameters of nPy and nPy-NO<sub>3</sub><sup>-</sup> in gas phase and solvent phase at B3LYP/6-31G(d)

| nPy                              | N <sub>4</sub> ---H <sub>5</sub> (Å) | O <sub>9</sub> --H <sub>5</sub> (Å) | C <sub>3</sub> N <sub>4</sub> C <sub>6</sub> | N <sub>4</sub> H <sub>5</sub> O <sub>9</sub> | C <sub>2</sub> C <sub>3</sub> N <sub>4</sub> C <sub>6</sub> | N <sub>4</sub> C <sub>6</sub> C <sub>7</sub> N <sub>8</sub> | N <sub>1</sub> C <sub>2</sub> C <sub>3</sub> N <sub>4</sub> |
|----------------------------------|--------------------------------------|-------------------------------------|----------------------------------------------|----------------------------------------------|-------------------------------------------------------------|-------------------------------------------------------------|-------------------------------------------------------------|
| 1Py (gas phase)                  | 1.00                                 | -----                               | 109.81                                       | -----                                        | -----                                                       | -----                                                       | -----                                                       |
| 1Py-NO <sub>3</sub> <sup>-</sup> | 1.04                                 | 1.77                                | 109.34                                       | 174.74                                       | -----                                                       | -----                                                       | -----                                                       |
| 1Py (solvent phase)              | 1.00                                 | -----                               | 109.93                                       | -----                                        | -----                                                       | -----                                                       | -----                                                       |
| 1Py-NO <sub>3</sub> <sup>-</sup> | 1.02                                 | 1.86                                | 109.44                                       | 174.16                                       | -----                                                       | -----                                                       | -----                                                       |
| 3Py(gas phase)                   | 1.00                                 | -----                               | 110.82                                       | -----                                        | -179.78                                                     | -155.23                                                     | -155.22                                                     |
| 3Py-NO <sub>3</sub> <sup>-</sup> | 1.04                                 | 1.75                                | 109.97                                       | 167.41                                       | -179.49                                                     | 170.53                                                      | 162.86                                                      |
| 3Py (solvent phase)              | 1.00                                 | -----                               | 110.76                                       | -----                                        | 179.62                                                      | 164.90                                                      | -164.90                                                     |
| 3Py-NO <sub>3</sub> <sup>-</sup> | 1.02                                 | 1.86                                | 110.08                                       | 169.43                                       | 179.63                                                      | 168.71                                                      | 162.75                                                      |
| 5Py (gas phase)                  | 1.00                                 | -----                               | 110.64                                       | -----                                        | 179.35                                                      | 157.65                                                      | -157.65                                                     |
| 5Py-NO <sub>3</sub> <sup>-</sup> | 1.04                                 | 1.74                                | 109.94                                       | 167.00                                       | 179.89                                                      | 170.57                                                      | 167.77                                                      |
| 5Py (solvent phase)              | 1.00                                 | -----                               | 110.63                                       | -----                                        | 179.79                                                      | 163.81                                                      | 163.80                                                      |
| 5Py-NO <sub>3</sub> <sup>-</sup> | 1.02                                 | 1.85                                | 110.07                                       | 169.052                                      | 179.41                                                      | 165.22                                                      | 170.98                                                      |
| 7Py (gas phase)                  | 1.00                                 | -----                               | 110.66                                       | -----                                        | -179.44                                                     | -157.13                                                     | 159.71                                                      |
| 7Py-NO <sub>3</sub> <sup>-</sup> | 1.04                                 | 1.73                                | 109.90                                       | 166.92                                       | 179.86                                                      | 170.57                                                      | 167.58                                                      |
| 7Py (solvent phase)              | 1.00                                 | -----                               | 110.65                                       | -----                                        | -179.89                                                     | -164.03                                                     | 168.41                                                      |
| 7Py-NO <sub>3</sub> <sup>-</sup> | 1.02                                 | 1.85                                | 110.06                                       | 169.19                                       | 179.94                                                      | 171.55                                                      | 165.11                                                      |
| 9Py (gas phase)                  | 1.00                                 | -----                               | 110.63                                       | -----                                        | 179.29                                                      | 157.12                                                      | -157.22                                                     |
| 9Py-NO <sub>3</sub> <sup>-</sup> | 1.04                                 | 1.73                                | 109.90                                       | 167.54                                       | -179.89                                                     | 171.85                                                      | 167.17                                                      |
| 9Py (solvent phase)              | 1.00                                 | -----                               | 110.61                                       | -----                                        | 179.92                                                      | 163.87                                                      | -163.74                                                     |
| 9Py-NO <sub>3</sub> <sup>-</sup> | 1.02                                 | 1.85                                | 110.06                                       | 169.37                                       | 179.63                                                      | 169.083                                                     | 166.16                                                      |

Table S2. Intermolecular bond distance ( $d_{O_9-H_5}$ ) with different level of theories

| Species                           | B3LYP/6-31G(d) | M05-2x/6-31G(d) | B3LYP-DCP/631G(d) & 6-31+G(2d,2p) | B3LYP-D3/6-31G(d) | B3LYP-CP/6-31G(d) |
|-----------------------------------|----------------|-----------------|-----------------------------------|-------------------|-------------------|
| 1Py- NO <sub>3</sub> <sup>-</sup> | 1.77 Å         | 1.82 Å          | 1.80 Å                            | 1.76 Å            | 1.79 Å            |
| 3Py- NO <sub>3</sub> <sup>-</sup> | 1.75 Å         | 1.76 Å          | 1.77 Å                            | 1.72 Å            | 1.80 Å            |
| 5Py- NO <sub>3</sub> <sup>-</sup> | 1.74 Å         | 1.73 Å          | 1.76 Å                            | 1.71 Å            | 1.80 Å            |
| 7Py- NO <sub>3</sub> <sup>-</sup> | 1.73 Å         | 1.72 Å          | 1.75 Å                            | 1.70 Å            | 1.78 Å            |
| 9Py- NO <sub>3</sub> <sup>-</sup> | 1.73 Å         | 1.72 Å          | 1.75 Å                            | 1.69 Å            | 1.78 Å            |

## Mullikan and NBO charge analysis

Transfer of charge is mostly related with the interaction of two or more than two species. Interaction of species causes the electronic properties to change due to transfer of charge<sup>42</sup>. Charge transfer gives the information about the conductivity, resistivity and selectivity of species toward each other<sup>57</sup>. For conducting polymers, charge transfer defines the sensing abilities of polymer towards analyte. The amount of charge transfer between PPy and nitrate ions are simulated in gas phase and in aqueous medium. Charge analysis for pyrrole, nitrate and pyrrole nitrate complex are given in Tables. 5 and Table 6.

In case of NBO charge analysis, the charge on isolated pyrrole monomer in the gas phase is  $-0.001 e^-$  while charge on nitrate ion is  $-0.999 e^-$  which can be expected for a neutral pyrrole and anionic nitrate species. However, in  $1\text{Py-NO}_3^-$  complex, nitrate ion transfers approximately about  $-0.082 e^-$  charge to pyrrole monomer based on NBO. Furthermore, in case of Mulliken charge analysis, the monomer contains about  $0.00 e^-$  charge and nitrate have  $-1.00 e^-$  charge, after the formation of complex,  $\text{NO}_3^-$  ion transfers  $-0.132 e^-$  charge to the pyrrole ring. The amount of NBO charge transfer is a bit lower than the Mulliken charge transfer.

The amount of charge transfer increases with increase in the chain length which is indicative of stronger sensing response of oligopyrrole with nitrate ion. This observation is consistent with the inferences obtained from the interaction energy analysis. The amount of Mulliken charge transfer from nitrate to 3Py in  $3\text{Py-NO}_3^-$  complex is  $-0.194 e^-$  which further increases to  $-0.198 e^-$ ,  $-0.202 e^-$  and  $-0.204 e^-$  for  $5\text{Py-NO}_3^-$ ,  $7\text{Py-NO}_3^-$  and  $9\text{Py-NO}_3^-$ , respectively. The charge transferred from the nitrate ion to oligopyrrole is not all restricted to the ring interacting with the nitrate ion, rather it is dispersed to the neighboring pyrrole ring. For example, for 3Py, the net charge transferred is  $-0.194 e^-$  (vide supra) but the pyrrole ring interacting with nitrate ion accepts only  $-0.047 e^-$  charge. The spread of charge to the neighboring rings in 3Py and high oligomers indicates an increase in conjugation in oligomer backbone upon adsorption. This increase in conjugation is also supported by the geometric parameters (vide supra). A similar trend in charge transfer is also obtained with NBO charge analysis. The NBO charge transferred from nitrate ion to 3Py in  $3\text{Py-NO}_3^-$  is  $-0.108 e^-$  which further increases to  $-0.111 e^-$  in  $5\text{Py-NO}_3^-$ . The charge transfer to 7Py and 9Py from nitrate ion in their complexes is  $-0.113 e^-$  and  $-0.115 e^-$  respectively. These results show that with increasing the number of repeating units increase the amount of charge transfer is also increased. Transfer of charge from nitrate ion to nPy is referred as the doping process of polymer and these results also illustrate the sensing ability of PPy toward nitrate ion.

The amount of charge transferred from nitrate ion to the pyrrole and higher oligomer in aqueous medium is relatively less pronounced, compared to gas phase. Net Mulliken charges on nitrate ion and pyrrole monomer are  $-1.001 e^-$ , and  $0.004 e^-$ , respectively. After complexation of nitrate ion with pyrrole, the nitrate ion transfers about  $-0.109 e^-$  charge to pyrrole monomer. Based on NBO, nitrate is having  $-1.001 e^-$  charge and total charge on pyrrole monomer is  $-0.001 e^-$  while upon interaction nitrate transfer  $-0.064 e^-$  charge to monomer. In both cases (Mulliken and NBO), approximately  $-0.002 e^-$  charge is dispersed in environment which contain water ions. In case of  $3\text{Py-NO}_3^-$  nitrate transfer about  $-0.146 e^-$  charge (based on Mulliken) to 3Py, out of which only  $-0.044 e^-$  charge is transfer to central pyrrole ring that is in

direct contact with nitrate ion while rest of charge is dispersed on other rings and environment. Based on NBO nitrate loses about -0.081 e- charge in case of 3Py- NO<sub>3</sub><sup>-</sup>. In case of 5Py- NO<sub>3</sub><sup>-</sup> , -0.152 e- charge is transferred to 5Py (based on Mulliken), and -0.08 e- charge based on NBO. In 7Py- NO<sub>3</sub><sup>-</sup> and 9Py- NO<sub>3</sub><sup>-</sup>, based on Mulliken 7Py oligomers gain about -0.152 e- charge from analyte and 9Py takes -0.149 e- charge from nitrate ion. However, nitrate ion transfer -0.081 and -0.08 e- charge to 7Py and 9Py oligomers, respectively. For infinite polymer total charge transfer is about -0.15 e- based on Mulliken, and -0.079 e- charge based on NBO.

**Table.5 Mulliken charge Analysis and NBO of Py and nPy-NO<sub>3</sub><sup>-</sup> in gas phase**

| Complex                          | Species | Py isolated | NO <sub>3</sub> <sup>-</sup> | PPy complex | in Nitrate complex | in | Amount of charge transfer |
|----------------------------------|---------|-------------|------------------------------|-------------|--------------------|----|---------------------------|
| <b>Mullikan</b>                  |         |             |                              |             |                    |    |                           |
| Py-NO <sub>3</sub> <sup>-</sup>  | 1Py     | 0.00        | -1.00                        | -0.132      | -0.868             |    | -0.132                    |
| 3Py-NO <sub>3</sub> <sup>-</sup> | 3Py     | 0.014       | -1.00                        | -0.047      | -0.806             |    | -0.194                    |
| 5Py-NO <sub>3</sub> <sup>-</sup> | 5Py     | 0.001       | -1.00                        | -0.043      | -0.802             |    | -0.198                    |
| 7Py-NO <sub>3</sub> <sup>-</sup> | 7Py     | 0.001       | -1.00                        | -0.038      | -0.798             |    | -0.202                    |
| 9Py-NO <sub>3</sub> <sup>-</sup> | 9Py     | -0.002      | -1.00                        | -0.034      | -0.796             |    | -0.204                    |
| ∞Py-NO <sub>3</sub> <sup>-</sup> | ∞       | -0.015      | -1.00                        | -0.036      | -0.793             |    | -0.206                    |
| <b>NBO</b>                       |         |             |                              |             |                    |    |                           |
| Py-NO <sub>3</sub> <sup>-</sup>  | 1Py     | -0.001      | -0.999                       | -0.083      | -0.917             |    | -0.082                    |
| 3Py-NO <sub>3</sub> <sup>-</sup> | 3Py     | -0.01       | -0.999                       | -0.057      | -0.891             |    | -0.108                    |
| 5Py-NO <sub>3</sub> <sup>-</sup> | 5Py     | -0.002      | -0.999                       | -0.034      | -0.888             |    | -0.111                    |
| 7Py-NO <sub>3</sub> <sup>-</sup> | 7Py     | -0.002      | -0.999                       | -0.028      | -0.886             |    | -0.113                    |
| 9Py-NO <sub>3</sub> <sup>-</sup> | 9Py     | -0.002      | -0.999                       | -0.024      | -0.884             |    | -0.115                    |
| ∞Py-NO <sub>3</sub> <sup>-</sup> | ∞       | 0.006       | -0.999                       | 0           | -0.882             |    | -0.12                     |

**Table. 6 Mulliken charge analysis and NBO of nPy-NO<sub>3</sub><sup>-</sup> in solvent phase**

| Complex                          | Species | Py isolated | NO <sub>3</sub> <sup>-</sup> | PPy complex | in Nitrate complex | in | Amount of charge transfer |
|----------------------------------|---------|-------------|------------------------------|-------------|--------------------|----|---------------------------|
| <b>Mullikan</b>                  |         |             |                              |             |                    |    |                           |
| Py-NO <sub>3</sub> <sup>-</sup>  | 1Py     | 0.004       | -1.001                       | -0.107      | -0.892             |    | -0.109                    |
| 3Py-NO <sub>3</sub> <sup>-</sup> | 3Py     | 0.016       | -1.001                       | -0.044      | -0.855             |    | -0.146                    |
| 5Py-NO <sub>3</sub> <sup>-</sup> | 5Py     | -0.003      | -1.001                       | -0.059      | -0.849             |    | -0.152                    |
| 7Py-NO <sub>3</sub> <sup>-</sup> | 7Py     | 0           | -1.001                       | -0.057      | -0.849             |    | -0.152                    |
| 9Py-NO <sub>3</sub> <sup>-</sup> | 9Py     | -0.003      | -1.001                       | -0.056      | -0.852             |    | -0.149                    |
| ∞Py-NO <sub>3</sub> <sup>-</sup> | ∞       | -0.017      | -1.001                       | -0.078      | -0.850             |    | -0.15                     |
| <b>NBO</b>                       |         |             |                              |             |                    |    |                           |
| Py-NO <sub>3</sub> <sup>-</sup>  | 1Py     | -0.001      | -1.001                       | -0.062      | -0.937             |    | -0.064                    |
| 3Py-NO <sub>3</sub> <sup>-</sup> | 3Py     | -0.009      | -1.001                       | -0.05       | -0.92              |    | -0.081                    |
| 5Py-NO <sub>3</sub> <sup>-</sup> | 5Py     | -0.006      | -1.001                       | -0.039      | -0.921             |    | -0.08                     |
| 7Py-NO <sub>3</sub> <sup>-</sup> | 7Py     | -0.002      | -1.001                       | -0.037      | -0.92              |    | -0.081                    |
| 9Py-NO <sub>3</sub> <sup>-</sup> | 9Py     | 0           | -1.001                       | -0.034      | -0.921             |    | -0.08                     |
| ∞Py-NO <sub>3</sub> <sup>-</sup> | ∞       | 0.006       | -1.001                       | -0.023      | -0.922             |    | -0.079                    |

## Coordinates of optimized structures in gas phase

### *Specie 1a: Pyrrole monomer*

|   |             |             |             |
|---|-------------|-------------|-------------|
| C | -1.01685347 | -2.96495692 | 0.00010400  |
| C | 0.38489653  | -2.96495692 | 0.00010400  |
| C | 0.80889453  | -1.59416092 | 0.00010400  |
| C | -0.34816247 | -0.80270792 | 0.00000000  |
| N | -1.45658047 | -1.64444892 | 0.00009500  |
| H | -2.39690847 | -1.35374792 | -0.00012200 |
| H | -1.71844147 | -3.79818992 | 0.00020200  |
| H | 1.02926953  | -3.83766292 | 0.00012900  |
| H | 1.83345753  | -1.23766892 | 0.00007900  |
| H | -0.45708447 | 0.28106408  | -0.00014700 |

### *Specie 1b. Nitrate ion (NO<sub>3</sub><sup>-</sup>):*

|   |             |             |            |
|---|-------------|-------------|------------|
| N | 0.00000000  | 0.00001500  | 0.00000000 |
| O | -0.17618000 | -1.22636500 | 0.00000000 |
| O | -0.97395300 | 0.76569200  | 0.00000000 |
| O | 1.15013300  | 0.46065900  | 0.00000000 |

### *Specie 1c. Pyrrole- NO<sub>3</sub><sup>-</sup> complex:*

|   |             |             |            |
|---|-------------|-------------|------------|
| C | -1.58938332 | 1.16244576  | 0.56891769 |
| C | -2.97061114 | 1.06168852  | 0.57500241 |
| C | -3.28597198 | -0.32654549 | 0.64342514 |
| C | -2.08184370 | -1.00991434 | 0.67599276 |
| N | -1.06460448 | -0.09672609 | 0.63023160 |
| H | -0.92532163 | 2.01308229  | 0.52678297 |
| H | -3.67104741 | 1.88766483  | 0.53493119 |
| H | -4.27366807 | -0.77238599 | 0.66594195 |
| H | -1.87039818 | -2.06956603 | 0.72763741 |
| H | -0.04647410 | -0.31011157 | 0.64061003 |

|   |            |             |            |
|---|------------|-------------|------------|
| O | 1.36824404 | -0.05381980 | 0.17910475 |
| O | 1.30463139 | 1.91605612  | 0.16235869 |
| N | 2.21818300 | 0.94819272  | 0.44211553 |
| O | 3.38236606 | 1.34546621  | 1.02215999 |

*Specie 2a: 3Py oligomers*

|   |             |             |             |
|---|-------------|-------------|-------------|
| C | 0.06631866  | -2.65547917 | 0.00010400  |
| C | 1.46806866  | -2.65547917 | 0.00010400  |
| C | 1.89206666  | -1.28468317 | 0.00010400  |
| C | 0.73500966  | -0.49323017 | 0.00000000  |
| N | -0.37340834 | -1.33497117 | 0.00009500  |
| H | -1.31373634 | -1.04427017 | -0.00012200 |
| H | 2.11244166  | -3.52818517 | 0.00012900  |
| H | 2.91662966  | -0.92819117 | 0.00007900  |
| C | -0.92558264 | -3.83349945 | 0.00024255  |
| C | -2.32743093 | -3.83385426 | 0.00023975  |
| N | -0.48561145 | -5.15393260 | 0.00042389  |
| C | -2.75104620 | -5.20476854 | 0.00059015  |
| H | -2.97203757 | -2.96133025 | 0.00010768  |
| C | -1.59387010 | -5.99587317 | 0.00069125  |
| H | 0.45471316  | -5.44464458 | 0.00064089  |
| H | -3.77551903 | -5.56154261 | 0.00072228  |
| H | -1.48494455 | -7.07968042 | 0.00083826  |
| C | 0.58101132  | 1.03905064  | -0.00020783 |
| C | -0.57604568 | 1.83050364  | -0.00031183 |
| N | 1.68942932  | 1.88079163  | -0.00034860 |
| C | -0.15204768 | 3.20129959  | -0.00068719 |
| H | -1.60060868 | 1.47401165  | -0.00023353 |
| C | 1.24970232  | 3.20129959  | -0.00069591 |

|   |             |            |             |
|---|-------------|------------|-------------|
| H | 2.62975732  | 1.59009058 | -0.00049240 |
| H | -0.79642068 | 4.07400556 | -0.00089547 |
| H | 1.95129032  | 4.03453258 | -0.00082883 |

***Specie 2b: 3Py-NO<sub>3</sub><sup>-</sup> complex***

|   |             |             |             |
|---|-------------|-------------|-------------|
| C | -1.35937472 | -2.43954709 | -0.00596232 |
| C | 0.04237528  | -2.43954709 | -0.00596232 |
| C | 0.46637328  | -1.06875109 | -0.00596232 |
| C | -0.69068372 | -0.27729809 | -0.00606632 |
| N | -1.79910172 | -1.11903909 | -0.00597132 |
| H | -2.73942972 | -0.82833809 | -0.00618832 |
| H | 0.68674828  | -3.31225309 | -0.00593732 |
| H | 1.49093628  | -0.71225909 | -0.00598732 |
| C | -2.35127602 | -3.61756737 | -0.00582377 |
| C | -3.75312431 | -3.61792219 | -0.00582657 |
| N | -1.91130483 | -4.93800052 | -0.00564244 |
| C | -4.17673957 | -4.98883647 | -0.00547617 |
| H | -4.39773094 | -2.74539817 | -0.00595865 |
| C | -3.01956347 | -5.77994109 | -0.00537507 |
| H | -0.97098022 | -5.22871250 | -0.00542544 |
| H | -5.20121240 | -5.34561053 | -0.00534404 |
| H | -2.91063793 | -6.86374834 | -0.00522806 |
| C | -0.84468206 | 1.25498272  | -0.00627416 |
| C | -2.00173906 | 2.04643572  | -0.00637816 |
| N | 0.26373594  | 2.09672371  | -0.00641492 |
| C | -1.57774106 | 3.41723167  | -0.00675351 |
| H | -3.02630206 | 1.68994372  | -0.00629985 |
| C | -0.17599106 | 3.41723166  | -0.00676223 |
| H | 1.20406394  | 1.80602266  | -0.00655873 |

|   |             |             |             |
|---|-------------|-------------|-------------|
| H | -2.22211406 | 4.28993764  | -0.00696179 |
| H | 0.52559694  | 4.25046466  | -0.00689515 |
| N | -5.80578443 | 0.00752585  | 0.47011165  |
| O | -4.48176751 | -0.19249223 | 0.23226306  |
| O | -6.28546633 | -0.05559265 | 1.74114326  |
| O | -6.65011310 | 0.27066144  | -0.56307214 |

***Specie 3a: 5Py oligomers***

|   |             |             |             |
|---|-------------|-------------|-------------|
| C | 0.06631866  | -2.65547917 | 0.00010400  |
| C | 1.46806866  | -2.65547917 | 0.00010400  |
| C | 1.89206666  | -1.28468317 | 0.00010400  |
| C | 0.73500966  | -0.49323017 | 0.00000000  |
| N | -0.37340834 | -1.33497117 | 0.00009500  |
| H | -1.31373634 | -1.04427017 | -0.00012200 |
| H | 2.11244166  | -3.52818517 | 0.00012900  |
| H | 2.91662966  | -0.92819117 | 0.00007900  |
| C | -0.92558264 | -3.83349945 | 0.00024255  |
| C | -2.32743093 | -3.83385426 | 0.00023975  |
| N | -0.48561145 | -5.15393260 | 0.00042389  |
| C | -2.75104620 | -5.20476854 | 0.00059015  |
| H | -2.97203757 | -2.96133025 | 0.00010768  |
| C | -1.59387010 | -5.99587317 | 0.00069125  |
| H | 0.45471316  | -5.44464458 | 0.00064089  |
| H | -3.77551903 | -5.56154261 | 0.00072228  |
| C | 0.58101132  | 1.03905064  | -0.00020783 |
| C | -0.57604568 | 1.83050364  | -0.00031183 |
| N | 1.68942932  | 1.88079163  | -0.00034860 |
| C | -0.15204768 | 3.20129959  | -0.00068719 |
| H | -1.60060868 | 1.47401165  | -0.00023353 |



|   |             |              |             |
|---|-------------|--------------|-------------|
| C | 1.24970232  | 3.20129959   | -0.00069591 |
| H | 2.62975732  | 1.59009058   | -0.00049240 |
| H | -0.79642068 | 4.07400556   | -0.00089547 |
| C | 2.24160362  | 4.37931987   | -0.00088383 |
| C | 3.64345192  | 4.37967467   | -0.00089261 |
| N | 1.80163244  | 5.69975302   | -0.00106194 |
| C | 4.06706719  | 5.75058899   | -0.00091908 |
| H | 4.28805855  | 3.50715065   | -0.00078865 |
| C | 2.90989109  | 6.54169362   | -0.00102957 |
| H | 0.86130783  | 5.99046505   | -0.00092054 |
| H | 5.09154002  | 6.10736308   | -0.00088885 |
| H | 2.80096555  | 7.62550087   | -0.00117865 |
| C | -1.43987175 | -7.52815397  | 0.00089909  |
| C | -0.28281475 | -8.31960697  | 0.00100309  |
| N | -2.54828975 | -8.36989497  | 0.00099409  |
| C | -0.70681275 | -9.69040297  | 0.00100309  |
| H | 0.74174825  | -7.96311497  | 0.00097809  |
| C | -2.10856275 | -9.69040297  | 0.00100309  |
| H | -3.48861775 | -8.07919397  | 0.00077709  |
| H | -0.06243975 | -10.56310897 | 0.00102809  |
| H | -2.81015075 | -10.52363597 | 0.00110109  |

***Specie 3b: 5Py-NO<sub>3</sub><sup>-</sup> complex***

|   |             |             |            |
|---|-------------|-------------|------------|
| C | -0.73674172 | -2.52368492 | 0.12044386 |
| C | 0.66500828  | -2.52368492 | 0.12044386 |
| C | 1.08900628  | -1.15288892 | 0.12044386 |
| C | -0.06805072 | -0.36143592 | 0.12033986 |
| N | -1.17646872 | -1.20317692 | 0.12043486 |
| H | -2.11679672 | -0.91247592 | 0.12021786 |

|   |             |              |            |
|---|-------------|--------------|------------|
| H | 1.30938128  | -3.39639092  | 0.12046886 |
| H | 2.11356928  | -0.79639692  | 0.12041886 |
| C | -0.22204906 | 1.17084488   | 0.12013202 |
| C | -1.37910606 | 1.96229788   | 0.12002802 |
| N | 0.88636894  | 2.01258588   | 0.11999126 |
| C | -0.95510806 | 3.33309383   | 0.11965267 |
| H | -2.40366906 | 1.60580589   | 0.12010633 |
| C | 0.44664194  | 3.33309383   | 0.11964395 |
| H | 1.82669694  | 1.72188483   | 0.11984745 |
| H | -1.59948106 | 4.20579981   | 0.11944439 |
| C | -1.72864302 | -3.70170521  | 0.12058241 |
| C | -3.13049131 | -3.70206002  | 0.12057961 |
| N | -1.28867183 | -5.02213836  | 0.12076374 |
| C | -3.55410658 | -5.07297430  | 0.12093001 |
| H | -3.77509795 | -2.82953600  | 0.12044753 |
| C | -2.39693048 | -5.86407892  | 0.12103111 |
| H | -0.34834722 | -5.31285034  | 0.12098075 |
| H | -4.57857941 | -5.42974836  | 0.12106214 |
| C | -2.24293214 | -7.39635973  | 0.12123895 |
| C | -1.08587514 | -8.18781273  | 0.12134295 |
| N | -3.35135014 | -8.23810073  | 0.12133395 |
| C | -1.50987314 | -9.55860873  | 0.12134295 |
| H | -0.06131214 | -7.83132073  | 0.12131795 |
| C | -2.91162314 | -9.55860873  | 0.12134295 |
| H | -4.29167814 | -7.94739973  | 0.12111695 |
| H | -0.86550014 | -10.43131473 | 0.12136795 |
| H | -3.61321114 | -10.39184173 | 0.12144095 |
| C | 1.43854324  | 4.51111411   | 0.11945603 |

|   |             |             |            |
|---|-------------|-------------|------------|
| C | 2.84039153  | 4.51146892  | 0.11944726 |
| N | 0.99857205  | 5.83154726  | 0.11927792 |
| C | 3.26400680  | 5.88238324  | 0.11942079 |
| H | 3.48499816  | 3.63894490  | 0.11955121 |
| C | 2.10683069  | 6.67348786  | 0.11931029 |
| H | 0.05824744  | 6.12225929  | 0.11941932 |
| H | 4.28847963  | 6.23915733  | 0.11945101 |
| H | 1.99790515  | 7.75729512  | 0.11916121 |
| N | -5.05906276 | -0.26440994 | 0.54306942 |
| O | -5.94268149 | -1.28616196 | 0.38545996 |
| O | -3.77905393 | -0.39845074 | 0.10351231 |
| O | -5.45545530 | 0.89138543  | 1.14023777 |

***Specie 4a. 7Py oligomers:***

|   |             |             |             |
|---|-------------|-------------|-------------|
| C | 0.06631866  | -2.65547917 | 0.00010400  |
| C | 1.46806866  | -2.65547917 | 0.00010400  |
| C | 1.89206666  | -1.28468317 | 0.00010400  |
| C | 0.73500966  | -0.49323017 | 0.00000000  |
| N | -0.37340834 | -1.33497117 | 0.00009500  |
| H | -1.31373634 | -1.04427017 | -0.00012200 |
| H | 2.11244166  | -3.52818517 | 0.00012900  |
| H | 2.91662966  | -0.92819117 | 0.00007900  |
| C | -0.92558264 | -3.83349945 | 0.00024255  |
| C | -2.32743093 | -3.83385426 | 0.00023975  |
| N | -0.48561145 | -5.15393260 | 0.00042389  |
| C | -2.75104620 | -5.20476854 | 0.00059015  |
| H | -2.97203757 | -2.96133025 | 0.00010768  |
| C | -1.59387010 | -5.99587317 | 0.00069125  |
| H | 0.45471316  | -5.44464458 | 0.00064089  |

|   |             |              |             |
|---|-------------|--------------|-------------|
| H | -3.77551903 | -5.56154261  | 0.00072228  |
| C | 0.58101132  | 1.03905064   | -0.00020783 |
| C | -0.57604568 | 1.83050364   | -0.00031183 |
| N | 1.68942932  | 1.88079163   | -0.00034860 |
| C | -0.15204768 | 3.20129959   | -0.00068719 |
| H | -1.60060868 | 1.47401165   | -0.00023353 |
| C | 1.24970232  | 3.20129959   | -0.00069591 |
| H | 2.62975732  | 1.59009058   | -0.00049240 |
| H | -0.79642068 | 4.07400556   | -0.00089547 |
| C | 2.24160362  | 4.37931987   | -0.00088383 |
| C | 3.64345192  | 4.37967467   | -0.00089261 |
| N | 1.80163244  | 5.69975302   | -0.00106194 |
| C | 4.06706719  | 5.75058899   | -0.00091908 |
| H | 4.28805855  | 3.50715065   | -0.00078865 |
| C | 2.90989109  | 6.54169362   | -0.00102957 |
| H | 0.86130783  | 5.99046505   | -0.00092054 |
| H | 5.09154002  | 6.10736308   | -0.00088885 |
| C | -1.43987175 | -7.52815397  | 0.00089909  |
| C | -0.28281475 | -8.31960697  | 0.00100309  |
| N | -2.54828975 | -8.36989497  | 0.00099409  |
| C | -0.70681275 | -9.69040297  | 0.00100309  |
| H | 0.74174825  | -7.96311497  | 0.00097809  |
| C | -2.10856275 | -9.69040297  | 0.00100309  |
| H | -3.48861775 | -8.07919397  | 0.00077709  |
| H | -0.06243975 | -10.56310897 | 0.00102809  |
| C | 2.75589275  | 8.07397443   | -0.00124034 |
| C | 1.59883425  | 8.86542522   | -0.00135088 |
| N | 3.86430915  | 8.91571753   | -0.00137717 |

|   |             |              |             |
|---|-------------|--------------|-------------|
| C | 2.02282964  | 10.23622198  | -0.00172626 |
| H | 0.57427193  | 8.50893128   | -0.00127682 |
| C | 3.42457964  | 10.23622465  | -0.00172846 |
| H | 4.80463770  | 8.62501827   | -0.00151618 |
| H | 1.37845498  | 11.10892673  | -0.00193881 |
| H | 4.12616605  | 11.06945898  | -0.00185933 |
| C | -3.10046405 | -10.86842326 | 0.00114164  |
| C | -4.50231234 | -10.86877807 | 0.00113884  |
| N | -2.66049286 | -12.18885640 | 0.00132298  |
| C | -4.92592761 | -12.23969235 | 0.00148924  |
| H | -5.14691898 | -9.99625405  | 0.00100677  |
| C | -3.76875151 | -13.03079697 | 0.00159034  |
| H | -1.72016825 | -12.47956838 | 0.00153998  |
| H | -5.95040044 | -12.59646641 | 0.00162137  |
| H | -3.65982596 | -14.11460422 | 0.00173735  |

***Specie 4b: 7Py-NO<sub>3</sub><sup>-</sup> complex***

|   |             |             |            |
|---|-------------|-------------|------------|
| C | -0.73674172 | -2.52368492 | 0.12044386 |
| C | 0.66500828  | -2.52368492 | 0.12044386 |
| C | 1.08900628  | -1.15288892 | 0.12044386 |
| C | -0.06805072 | -0.36143592 | 0.12033986 |
| N | -1.17646872 | -1.20317692 | 0.12043486 |
| H | -2.11679672 | -0.91247592 | 0.12021786 |
| H | 1.30938128  | -3.39639092 | 0.12046886 |
| H | 2.11356928  | -0.79639692 | 0.12041886 |
| C | -0.22204906 | 1.17084488  | 0.12013202 |
| C | -1.37910606 | 1.96229788  | 0.12002802 |
| N | 0.88636894  | 2.01258588  | 0.11999126 |
| C | -0.95510806 | 3.33309383  | 0.11965267 |

|   |             |              |            |
|---|-------------|--------------|------------|
| H | -2.40366906 | 1.60580589   | 0.12010633 |
| C | 0.44664194  | 3.33309383   | 0.11964395 |
| H | 1.82669694  | 1.72188483   | 0.11984745 |
| H | -1.59948106 | 4.20579981   | 0.11944439 |
| C | -1.72864302 | -3.70170521  | 0.12058241 |
| C | -3.13049131 | -3.70206002  | 0.12057961 |
| N | -1.28867183 | -5.02213836  | 0.12076374 |
| C | -3.55410658 | -5.07297430  | 0.12093001 |
| H | -3.77509795 | -2.82953600  | 0.12044753 |
| C | -2.39693048 | -5.86407892  | 0.12103111 |
| H | -0.34834722 | -5.31285034  | 0.12098075 |
| H | -4.57857941 | -5.42974836  | 0.12106214 |
| C | -2.24293214 | -7.39635973  | 0.12123895 |
| C | -1.08587514 | -8.18781273  | 0.12134295 |
| N | -3.35135014 | -8.23810073  | 0.12133395 |
| C | -1.50987314 | -9.55860873  | 0.12134295 |
| H | -0.06131214 | -7.83132073  | 0.12131795 |
| C | -2.91162314 | -9.55860873  | 0.12134295 |
| H | -4.29167814 | -7.94739973  | 0.12111695 |
| H | -0.86550014 | -10.43131473 | 0.12136795 |
| C | 1.43854324  | 4.51111411   | 0.11945603 |
| C | 2.84039153  | 4.51146892   | 0.11944726 |
| N | 0.99857205  | 5.83154726   | 0.11927792 |
| C | 3.26400680  | 5.88238324   | 0.11942079 |
| H | 3.48499816  | 3.63894490   | 0.11955121 |
| C | 2.10683069  | 6.67348786   | 0.11931029 |
| H | 0.05824744  | 6.12225929   | 0.11941932 |
| H | 4.28847963  | 6.23915733   | 0.11945101 |

|   |             |              |            |
|---|-------------|--------------|------------|
| N | -5.05906276 | -0.26440994  | 0.54306942 |
| O | -5.94268149 | -1.28616196  | 0.38545996 |
| O | -3.77905393 | -0.39845074  | 0.10351231 |
| O | -5.45545530 | 0.89138543   | 1.14023777 |
| C | -3.90352444 | -10.73662902 | 0.12148150 |
| C | -5.30537273 | -10.73698383 | 0.12147870 |
| N | -3.46355325 | -12.05706216 | 0.12166284 |
| C | -5.72898800 | -12.10789811 | 0.12182910 |
| H | -5.94997937 | -9.86445981  | 0.12134663 |
| C | -4.57181190 | -12.89900273 | 0.12193020 |
| H | -2.52322864 | -12.34777414 | 0.12187984 |
| H | -6.75346083 | -12.46467217 | 0.12196123 |
| H | -4.46288635 | -13.98280998 | 0.12207721 |
| C | 1.95283235  | 8.20576867   | 0.11909952 |
| C | 0.79577385  | 8.99721946   | 0.11898897 |
| N | 3.06124875  | 9.04751177   | 0.11896270 |
| C | 1.21976924  | 10.36801622  | 0.11861359 |
| H | -0.22878847 | 8.64072552   | 0.11906302 |
| C | 2.62151924  | 10.36801889  | 0.11861141 |
| H | 4.00157731  | 8.75681251   | 0.11882370 |
| H | 0.57539458  | 11.24072097  | 0.11840104 |
| H | 3.32310566  | 11.20125321  | 0.11848054 |

***Specie 5a. 9Py oligomers***

|   |             |             |            |
|---|-------------|-------------|------------|
| C | 0.06631866  | -2.65547917 | 0.00010400 |
| C | 1.46806866  | -2.65547917 | 0.00010400 |
| C | 1.89206666  | -1.28468317 | 0.00010400 |
| C | 0.73500966  | -0.49323017 | 0.00000000 |
| N | -0.37340834 | -1.33497117 | 0.00009500 |

|   |             |             |             |
|---|-------------|-------------|-------------|
| H | -1.31373634 | -1.04427017 | -0.00012200 |
| H | 2.11244166  | -3.52818517 | 0.00012900  |
| H | 2.91662966  | -0.92819117 | 0.00007900  |
| C | -0.92558264 | -3.83349945 | 0.00024255  |
| C | -2.32743093 | -3.83385426 | 0.00023975  |
| N | -0.48561145 | -5.15393260 | 0.00042389  |
| C | -2.75104620 | -5.20476854 | 0.00059015  |
| H | -2.97203757 | -2.96133025 | 0.00010768  |
| C | -1.59387010 | -5.99587317 | 0.00069125  |
| H | 0.45471316  | -5.44464458 | 0.00064089  |
| H | -3.77551903 | -5.56154261 | 0.00072228  |
| C | 0.58101132  | 1.03905064  | -0.00020783 |
| C | -0.57604568 | 1.83050364  | -0.00031183 |
| N | 1.68942932  | 1.88079163  | -0.00034860 |
| C | -0.15204768 | 3.20129959  | -0.00068719 |
| H | -1.60060868 | 1.47401165  | -0.00023353 |
| C | 1.24970232  | 3.20129959  | -0.00069591 |
| H | 2.62975732  | 1.59009058  | -0.00049240 |
| H | -0.79642068 | 4.07400556  | -0.00089547 |
| C | 2.24160362  | 4.37931987  | -0.00088383 |
| C | 3.64345192  | 4.37967467  | -0.00089261 |
| N | 1.80163244  | 5.69975302  | -0.00106194 |
| C | 4.06706719  | 5.75058899  | -0.00091908 |
| H | 4.28805855  | 3.50715065  | -0.00078865 |
| C | 2.90989109  | 6.54169362  | -0.00102957 |
| H | 0.86130783  | 5.99046505  | -0.00092054 |
| H | 5.09154002  | 6.10736308  | -0.00088885 |
| C | -1.43987175 | -7.52815397 | 0.00089909  |



|   |             |              |             |
|---|-------------|--------------|-------------|
| C | -0.28281475 | -8.31960697  | 0.00100309  |
| N | -2.54828975 | -8.36989497  | 0.00099409  |
| C | -0.70681275 | -9.69040297  | 0.00100309  |
| H | 0.74174825  | -7.96311497  | 0.00097809  |
| C | -2.10856275 | -9.69040297  | 0.00100309  |
| H | -3.48861775 | -8.07919397  | 0.00077709  |
| H | -0.06243975 | -10.56310897 | 0.00102809  |
| C | 2.75589275  | 8.07397443   | -0.00124034 |
| C | 1.59883425  | 8.86542522   | -0.00135088 |
| N | 3.86430915  | 8.91571753   | -0.00137717 |
| C | 2.02282964  | 10.23622198  | -0.00172626 |
| H | 0.57427193  | 8.50893128   | -0.00127682 |
| C | 3.42457964  | 10.23622465  | -0.00172846 |
| H | 4.80463770  | 8.62501827   | -0.00151618 |
| H | 1.37845498  | 11.10892673  | -0.00193881 |
| C | -3.10046405 | -10.86842326 | 0.00114164  |
| C | -4.50231234 | -10.86877807 | 0.00113884  |
| N | -2.66049286 | -12.18885640 | 0.00132298  |
| C | -4.92592761 | -12.23969235 | 0.00148924  |
| H | -5.14691898 | -9.99625405  | 0.00100677  |
| C | -3.76875151 | -13.03079697 | 0.00159034  |
| H | -1.72016825 | -12.47956838 | 0.00153998  |
| H | -5.95040044 | -12.59646641 | 0.00162137  |
| C | 4.41647869  | 11.41424682  | -0.00191348 |
| C | 5.81832699  | 11.41460430  | -0.00191574 |
| N | 3.97650499  | 12.73467913  | -0.00209556 |
| C | 6.24193964  | 12.78551943  | -0.00194223 |
| H | 6.46293528  | 10.54208151  | -0.00180751 |

|   |             |              |             |
|---|-------------|--------------|-------------|
| C | 5.08476203  | 13.57662185  | -0.00205927 |
| H | 3.03617983  | 13.02538937  | -0.00195895 |
| H | 7.26641179  | 13.14229547  | -0.00190777 |
| H | 4.97583442  | 14.66042890  | -0.00221043 |
| C | -3.61475316 | -14.56307777 | 0.00179818  |
| C | -2.45769616 | -15.35453077 | 0.00190218  |
| N | -4.72317116 | -15.40481877 | 0.00189318  |
| C | -2.88169416 | -16.72532677 | 0.00190218  |
| H | -1.43313316 | -14.99803877 | 0.00187718  |
| C | -4.28344416 | -16.72532677 | 0.00190218  |
| H | -5.66349916 | -15.11411777 | 0.00167618  |
| H | -2.23732116 | -17.59803277 | 0.00192718  |
| H | -4.98503216 | -17.55855977 | 0.00200018  |

***Specie 5b. 9Py-NO<sub>3</sub><sup>-</sup> complex***

|   |             |             |            |
|---|-------------|-------------|------------|
| C | -0.73674172 | -2.52368492 | 0.12044386 |
| C | 0.66500828  | -2.52368492 | 0.12044386 |
| C | 1.08900628  | -1.15288892 | 0.12044386 |
| C | -0.06805072 | -0.36143592 | 0.12033986 |
| N | -1.17646872 | -1.20317692 | 0.12043486 |
| H | -2.11679672 | -0.91247592 | 0.12021786 |
| H | 1.30938128  | -3.39639092 | 0.12046886 |
| H | 2.11356928  | -0.79639692 | 0.12041886 |
| C | -0.22204906 | 1.17084488  | 0.12013202 |
| C | -1.37910606 | 1.96229788  | 0.12002802 |
| N | 0.88636894  | 2.01258588  | 0.11999126 |
| C | -0.95510806 | 3.33309383  | 0.11965267 |
| H | -2.40366906 | 1.60580589  | 0.12010633 |
| C | 0.44664194  | 3.33309383  | 0.11964395 |

|   |             |              |            |
|---|-------------|--------------|------------|
| H | 1.82669694  | 1.72188483   | 0.11984745 |
| H | -1.59948106 | 4.20579981   | 0.11944439 |
| C | -1.72864302 | -3.70170521  | 0.12058241 |
| C | -3.13049131 | -3.70206002  | 0.12057961 |
| N | -1.28867183 | -5.02213836  | 0.12076374 |
| C | -3.55410658 | -5.07297430  | 0.12093001 |
| H | -3.77509795 | -2.82953600  | 0.12044753 |
| C | -2.39693048 | -5.86407892  | 0.12103111 |
| H | -0.34834722 | -5.31285034  | 0.12098075 |
| H | -4.57857941 | -5.42974836  | 0.12106214 |
| C | -2.24293214 | -7.39635973  | 0.12123895 |
| C | -1.08587514 | -8.18781273  | 0.12134295 |
| N | -3.35135014 | -8.23810073  | 0.12133395 |
| C | -1.50987314 | -9.55860873  | 0.12134295 |
| H | -0.06131214 | -7.83132073  | 0.12131795 |
| C | -2.91162314 | -9.55860873  | 0.12134295 |
| H | -4.29167814 | -7.94739973  | 0.12111695 |
| H | -0.86550014 | -10.43131473 | 0.12136795 |
| C | 1.43854324  | 4.51111411   | 0.11945603 |
| C | 2.84039153  | 4.51146892   | 0.11944726 |
| N | 0.99857205  | 5.83154726   | 0.11927792 |
| C | 3.26400680  | 5.88238324   | 0.11942079 |
| H | 3.48499816  | 3.63894490   | 0.11955121 |
| C | 2.10683069  | 6.67348786   | 0.11931029 |
| H | 0.05824744  | 6.12225929   | 0.11941932 |
| H | 4.28847963  | 6.23915733   | 0.11945101 |
| N | -5.05906276 | -0.26440994  | 0.54306942 |
| O | -5.94268149 | -1.28616196  | 0.38545996 |

|   |             |              |            |
|---|-------------|--------------|------------|
| O | -3.77905393 | -0.39845074  | 0.10351231 |
| O | -5.45545530 | 0.89138543   | 1.14023777 |
| C | -3.90352444 | -10.73662902 | 0.12148150 |
| C | -5.30537273 | -10.73698383 | 0.12147870 |
| N | -3.46355325 | -12.05706216 | 0.12166284 |
| C | -5.72898800 | -12.10789811 | 0.12182910 |
| H | -5.94997937 | -9.86445981  | 0.12134663 |
| C | -4.57181190 | -12.89900273 | 0.12193020 |
| H | -2.52322864 | -12.34777414 | 0.12187984 |
| H | -6.75346083 | -12.46467217 | 0.12196123 |
| C | 1.95283235  | 8.20576867   | 0.11909952 |
| C | 0.79577385  | 8.99721946   | 0.11898897 |
| N | 3.06124875  | 9.04751177   | 0.11896270 |
| C | 1.21976924  | 10.36801622  | 0.11861359 |
| H | -0.22878847 | 8.64072552   | 0.11906302 |
| C | 2.62151924  | 10.36801889  | 0.11861141 |
| H | 4.00157731  | 8.75681251   | 0.11882370 |
| H | 0.57539458  | 11.24072097  | 0.11840104 |
| C | -4.41781355 | -14.43128353 | 0.12213804 |
| C | -3.26075655 | -15.22273653 | 0.12224204 |
| N | -5.52623155 | -15.27302453 | 0.12223304 |
| C | -3.68475455 | -16.59353253 | 0.12224204 |
| H | -2.23619355 | -14.86624453 | 0.12221704 |
| C | -5.08650455 | -16.59353253 | 0.12224204 |
| H | -6.46655955 | -14.98232353 | 0.12201604 |
| H | -3.04038155 | -17.46623853 | 0.12226704 |
| H | -5.78809255 | -17.42676553 | 0.12234004 |
| C | 3.61341831  | 11.54604105  | 0.11842639 |

|   |            |             |            |
|---|------------|-------------|------------|
| C | 5.01526660 | 11.54639851 | 0.11842415 |
| N | 3.17344462 | 12.86647336 | 0.11824429 |
| C | 5.43887927 | 12.91731364 | 0.11839765 |
| H | 5.65987489 | 10.67387571 | 0.11853240 |
| C | 4.28170167 | 13.70841607 | 0.11828059 |
| H | 2.23311946 | 13.15718361 | 0.11838088 |
| H | 6.46335143 | 13.27408966 | 0.11843212 |
| H | 4.17277408 | 14.79222312 | 0.11812941 |

### Co-ordinates of optimized structures in solvent phase

#### *Specie 6a. 1Py*

|   |             |             |             |
|---|-------------|-------------|-------------|
| C | 0.33151100  | -1.12552700 | -0.00002700 |
| C | -0.98349600 | -0.71273000 | -0.00012500 |
| C | -0.98345300 | 0.71279000  | 0.00008300  |
| C | 0.33157900  | 1.12550800  | 0.00000800  |
| N | 1.12233300  | -0.00003400 | 0.00004300  |
| H | 2.13032900  | -0.00006800 | 0.00019600  |
| H | 0.76769700  | -2.11414400 | -0.00006900 |
| H | -1.84956300 | -1.36087500 | -0.00023700 |
| H | -1.84947800 | 1.36099000  | 0.00014200  |
| H | 0.76783700  | 2.11409400  | 0.00003300  |

#### *Specie 6b. Nitrate ion*

|   |             |             |            |
|---|-------------|-------------|------------|
| N | 0.00000000  | 0.00007300  | 0.00000000 |
| O | -0.76257300 | 1.00852400  | 0.00000000 |
| O | 1.25468200  | 0.15589300  | 0.00000000 |
| O | -0.49210900 | -1.16448000 | 0.00000000 |

#### *Specie 6c. 1Py-NO<sub>3</sub><sup>-</sup> complex*

|   |             |             |             |
|---|-------------|-------------|-------------|
| C | -1.48734100 | 1.00151200  | -0.00011400 |
| C | -2.87023800 | 0.92654300  | 0.00024900  |
| C | -3.21164300 | -0.45720800 | 0.00016500  |

|   |             |             |             |
|---|-------------|-------------|-------------|
| C | -2.02056400 | -1.16382800 | -0.00021700 |
| N | -0.98631300 | -0.26874300 | -0.00049800 |
| H | -0.80739900 | 1.84056200  | -0.00000300 |
| H | -3.55504000 | 1.76648100  | 0.00043800  |
| H | -4.20758200 | -0.88492000 | 0.00028000  |
| H | -1.82898200 | -2.22849600 | -0.00062200 |
| H | 0.02756900  | -0.50143900 | -0.00005900 |
| O | 1.71497700  | -1.05577000 | 0.00054200  |
| O | 1.84848000  | 1.13175500  | -0.00002300 |
| N | 2.42216700  | 0.01075100  | 0.00008800  |
| O | 3.66893900  | -0.07953000 | -0.00022600 |

***Specie 7a. 3Py oligomers***

|   |             |             |             |
|---|-------------|-------------|-------------|
| C | 1.13523100  | -0.51542000 | 0.02796000  |
| C | 0.70843900  | -1.83824100 | 0.01934300  |
| C | -0.70847300 | -1.83822000 | -0.01935000 |
| C | -1.13522500 | -0.51538200 | -0.02804200 |
| N | 0.00001600  | 0.26755600  | 0.00007100  |
| H | 0.00004600  | 1.27642800  | -0.00042700 |
| H | 1.35016400  | -2.70814400 | 0.06942800  |
| H | -1.35023400 | -2.70810200 | -0.06932700 |
| C | 2.46009400  | 0.06641100  | 0.06526600  |
| C | 2.91722500  | 1.29676600  | 0.52044800  |
| N | 3.56336000  | -0.62064500 | -0.40077200 |
| C | 4.32274500  | 1.34346700  | 0.31228100  |
| H | 2.31125700  | 2.05801700  | 0.99434300  |
| C | 4.69544100  | 0.14639600  | -0.26108600 |
| H | 3.51401800  | -1.51253100 | -0.86889700 |
| H | 4.98716800  | 2.15777200  | 0.56761800  |
| H | 5.66095600  | -0.22171500 | -0.57618100 |
| C | -2.46008500 | 0.06643400  | -0.06532300 |

|   |             |             |             |
|---|-------------|-------------|-------------|
| C | -2.91725500 | 1.29680600  | -0.52042000 |
| N | -3.56332300 | -0.62069100 | 0.40068500  |
| C | -4.32277700 | 1.34345300  | -0.31221500 |
| H | -2.31136900 | 2.05806100  | -0.99441900 |
| C | -4.69542200 | 0.14636600  | 0.26113100  |
| H | -3.51383300 | -1.51227400 | 0.86937300  |
| H | -4.98721800 | 2.15776000  | -0.56750200 |
| H | -5.66093500 | -0.22182800 | 0.57613400  |

***Specie 7b. 3Py-NO<sub>3</sub><sup>-</sup> complex***

|   |             |             |             |
|---|-------------|-------------|-------------|
| C | -1.14508600 | -1.34156300 | 0.05648700  |
| C | -0.73937700 | -2.66703800 | 0.21261400  |
| C | 0.67464800  | -2.68129100 | 0.19737300  |
| C | 1.10619600  | -1.36378400 | 0.03861300  |
| N | -0.01321300 | -0.56940200 | -0.04402400 |
| H | -0.00345600 | 0.46028100  | -0.20520800 |
| H | -1.39207400 | -3.51976700 | 0.35744800  |
| H | 1.30856200  | -3.55675400 | 0.27692200  |
| C | -2.48106400 | -0.78344800 | -0.00730000 |
| C | -2.96108300 | 0.50832200  | 0.15961900  |
| N | -3.57454000 | -1.59710700 | -0.25579200 |
| C | -4.37389300 | 0.46070600  | -0.00574300 |
| H | -2.34971700 | 1.37348100  | 0.39454100  |
| C | -4.72914900 | -0.84620500 | -0.26871800 |
| H | -3.50115700 | -2.56559700 | -0.52372200 |
| H | -5.05594100 | 1.29808700  | 0.07061100  |
| H | -5.69034000 | -1.30461800 | -0.45650500 |
| C | 2.45529500  | -0.83738700 | -0.03826800 |
| C | 2.95736100  | 0.41295300  | -0.37706800 |
| N | 3.54394000  | -1.64622200 | 0.24394300  |
| C | 4.37544100  | 0.34432100  | -0.28515700 |

|   |             |             |             |
|---|-------------|-------------|-------------|
| H | 2.35170700  | 1.26655100  | -0.65780200 |
| C | 4.71465400  | -0.93425500 | 0.10530500  |
| H | 3.46937800  | -2.58658700 | 0.59715100  |
| H | 5.06996000  | 1.14968100  | -0.48751000 |
| H | 5.67385000  | -1.39700700 | 0.29212300  |
| N | 0.04164200  | 3.05877300  | 0.07514900  |
| O | 0.26202200  | 2.10254500  | -0.75456200 |
| O | -0.81086300 | 2.90148400  | 0.98461600  |
| O | 0.67518900  | 4.12496700  | -0.04499400 |

***Specie 8a. 5Py oligomers***

|   |             |             |             |
|---|-------------|-------------|-------------|
| C | 1.13555600  | -0.09023300 | -0.56313600 |
| C | 0.70843800  | -1.35636700 | -0.94740400 |
| C | -0.70845200 | -1.35635900 | -0.94737400 |
| C | -1.13555600 | -0.09020700 | -0.56313500 |
| N | 0.00001500  | 0.66430700  | -0.34421700 |
| H | 0.00005300  | 1.57366500  | 0.09263700  |
| H | 1.35064600  | -2.17172700 | -1.25338200 |
| H | -1.35065700 | -2.17176200 | -1.25324800 |
| C | 2.45780500  | 0.46304900  | -0.38836300 |
| C | 2.91899500  | 1.77437700  | -0.40638200 |
| N | 3.55537900  | -0.34221200 | -0.15611000 |
| C | 4.31678800  | 1.74700700  | -0.17223200 |
| H | 2.32158800  | 2.64927300  | -0.62693300 |
| C | 4.69696700  | 0.41988300  | -0.01200400 |
| H | 3.50164900  | -1.32584800 | 0.06191100  |
| H | 4.98576000  | 2.59759700  | -0.18157600 |
| C | -2.45778500 | 0.46308400  | -0.38828600 |
| C | -2.91898400 | 1.77442300  | -0.40623800 |
| N | -3.55535500 | -0.34216300 | -0.15598400 |
| C | -4.31676200 | 1.74703400  | -0.17208400 |



|   |             |             |             |
|---|-------------|-------------|-------------|
| H | -2.32160000 | 2.64936000  | -0.62668900 |
| C | -4.69694700 | 0.41990300  | -0.01187300 |
| H | -3.50162200 | -1.32588400 | 0.06164300  |
| H | -4.98566200 | 2.59768300  | -0.18127500 |
| C | -5.98283000 | -0.18703000 | 0.25437300  |
| C | -6.47579000 | -1.45856400 | -0.01187400 |
| N | -6.99726200 | 0.51099300  | 0.87893900  |
| C | -7.81088800 | -1.51786600 | 0.47205900  |
| H | -5.94640000 | -2.24037000 | -0.54060000 |
| C | -8.10689400 | -0.28793600 | 1.02028600  |
| H | -6.89100500 | 1.43886000  | 1.25946100  |
| H | -8.48311300 | -2.36299200 | 0.41197500  |
| H | -9.00479800 | 0.08321900  | 1.49253100  |
| C | 5.98283100  | -0.18705600 | 0.25435100  |
| C | 6.47568800  | -1.45871400 | -0.01150400 |
| N | 6.99734300  | 0.51113100  | 0.87860900  |
| C | 7.81079600  | -1.51793900 | 0.47242200  |
| H | 5.94622000  | -2.24055200 | -0.54010500 |
| C | 8.10690700  | -0.28785000 | 1.02022300  |
| H | 6.89098400  | 1.43901500  | 1.25906500  |
| H | 8.48298200  | -2.36311600 | 0.41260200  |
| H | 9.00483800  | 0.08335800  | 1.49237500  |

***Specie 8b. 5Py-NO<sub>3</sub><sup>-</sup> complex***

|   |             |             |             |
|---|-------------|-------------|-------------|
| C | -1.13563200 | -0.73543100 | 0.04377900  |
| C | -0.71682500 | -2.06218400 | 0.16435100  |
| C | 0.69222800  | -2.07065300 | 0.07836900  |
| C | 1.11096000  | -0.74877900 | -0.08989700 |
| N | -0.01330900 | 0.04235800  | -0.10555700 |
| H | -0.01508100 | 1.07149600  | -0.26904900 |
| H | -1.35604200 | -2.92272100 | 0.32158300  |

|   |             |             |             |
|---|-------------|-------------|-------------|
| H | 1.33280000  | -2.94350600 | 0.11497300  |
| C | 2.44898300  | -0.21577000 | -0.22669500 |
| C | 2.92062800  | 1.04936900  | -0.56562400 |
| N | 3.55650300  | -1.01793500 | -0.01267100 |
| C | 4.33523600  | 0.99717300  | -0.53589600 |
| H | 2.29380900  | 1.89804200  | -0.81450000 |
| C | 4.71985100  | -0.29097300 | -0.17959400 |
| H | 3.51930000  | -1.93501900 | 0.40418200  |
| H | 5.00721500  | 1.80566100  | -0.79713400 |
| C | -2.46843000 | -0.17536100 | 0.06722800  |
| C | -2.91874200 | 1.13499100  | 0.20279400  |
| N | -3.58638100 | -0.98254600 | -0.03279200 |
| C | -4.33340800 | 1.09793300  | 0.18593300  |
| H | -2.28330500 | 2.00759900  | 0.31739700  |
| C | -4.73899600 | -0.22592200 | 0.04235700  |
| H | -3.56403600 | -1.98715000 | -0.10942300 |
| H | -4.99207100 | 1.95661300  | 0.23573600  |
| C | -6.05377200 | -0.82136100 | -0.02755200 |
| C | -6.50675300 | -2.03678300 | -0.53070000 |
| N | -7.16294600 | -0.16391000 | 0.46722000  |
| C | -7.91358600 | -2.10047200 | -0.32264100 |
| H | -5.89571500 | -2.77477500 | -1.03396900 |
| C | -8.29470800 | -0.93032000 | 0.29768000  |
| H | -7.11161300 | 0.71230000  | 0.96339500  |
| H | -8.57340600 | -2.90882200 | -0.61012300 |
| H | -9.26218400 | -0.57761100 | 0.62500900  |
| C | 6.02466200  | -0.88047600 | 0.01489000  |
| C | 6.47295700  | -2.19674700 | -0.02601200 |
| N | 7.12504100  | -0.09912900 | 0.30771400  |
| C | 7.86849400  | -2.19272200 | 0.25500800  |

|   |             |             |             |
|---|-------------|-------------|-------------|
| H | 5.86701700  | -3.05703100 | -0.27868600 |
| C | 8.24696900  | -0.88332900 | 0.45971000  |
| H | 7.06833600  | 0.89226000  | 0.48316100  |
| H | 8.52362500  | -3.05362900 | 0.28830200  |
| H | 9.20672200  | -0.44558700 | 0.69383700  |
| N | 0.07309500  | 3.67545800  | -0.01302500 |
| O | -0.82196200 | 3.60208100  | 0.86502000  |
| O | 0.22709200  | 2.70025700  | -0.83721600 |
| O | 0.81110700  | 4.67375100  | -0.10978600 |

***Specie 9a. 7Py oligomers***

|   |             |             |             |
|---|-------------|-------------|-------------|
| C | -1.13115500 | 0.27151300  | -0.69452300 |
| C | -0.74082900 | 1.55470400  | -1.06205600 |
| C | 0.67134600  | 1.56518300  | -1.17551900 |
| C | 1.13281400  | 0.28794500  | -0.87727300 |
| N | 0.02158000  | -0.48255200 | -0.59783200 |
| H | 0.06198200  | -1.40760400 | -0.19729000 |
| H | -1.40675900 | 2.37905000  | -1.28184100 |
| H | 1.28346400  | 2.39609300  | -1.50056200 |
| C | -2.43236800 | -0.29879500 | -0.43770200 |
| C | -2.87862800 | -1.61656000 | -0.44292400 |
| N | -3.52280600 | 0.48762300  | -0.12679600 |
| C | -4.25860600 | -1.61019900 | -0.12684500 |
| H | -2.27811400 | -2.48480800 | -0.68032800 |
| C | -4.64707400 | -0.28840600 | 0.06660000  |
| H | -3.50211700 | 1.49337800  | -0.05367900 |
| H | -4.89686700 | -2.47715600 | -0.01862000 |
| C | 2.46601800  | -0.26429400 | -0.83355000 |
| C | 2.92655700  | -1.57080400 | -0.95338400 |
| N | 3.57690600  | 0.53484000  | -0.64790500 |
| C | 4.33743600  | -1.54830800 | -0.82687300 |

|   |             |             |             |
|---|-------------|-------------|-------------|
| H | 2.31477400  | -2.43651700 | -1.17057500 |
| C | 4.72762300  | -0.22818400 | -0.63061600 |
| H | 3.53718900  | 1.50510100  | -0.37431700 |
| H | 5.00495100  | -2.39371200 | -0.92935200 |
| C | 6.02878500  | 0.36721000  | -0.43689400 |
| C | 6.49104800  | 1.66207300  | -0.64243900 |
| N | 7.10006300  | -0.36884400 | 0.02979800  |
| C | 7.86193500  | 1.69653000  | -0.28370500 |
| H | 5.91705000  | 2.47627000  | -1.06498100 |
| C | 8.22481900  | 0.42331300  | 0.13914100  |
| H | 7.02637600  | -1.30066000 | 0.40961300  |
| H | 8.52979600  | 2.54232100  | -0.38196600 |
| C | -5.92257800 | 0.29381000  | 0.41270200  |
| C | -6.25463900 | 1.51540000  | 0.98733100  |
| N | -7.10893800 | -0.37808400 | 0.19309600  |
| C | -7.66631400 | 1.57280300  | 1.10286600  |
| H | -5.55230400 | 2.25873300  | 1.34161000  |
| C | -8.18431800 | 0.38659500  | 0.59714900  |
| H | -7.19086100 | -1.22172800 | -0.35422800 |
| H | -8.24094100 | 2.36645300  | 1.56221000  |
| C | 9.48097700  | -0.10987100 | 0.61925900  |
| C | 9.99359300  | -1.40128000 | 0.62173200  |
| N | 10.43667200 | 0.69953900  | 1.20051100  |
| C | 11.28018100 | -1.35765600 | 1.22421900  |
| H | 9.51207600  | -2.26954800 | 0.19134800  |
| C | 11.52803500 | -0.04753300 | 1.57515000  |
| H | 10.29817000 | 1.67743300  | 1.40447500  |
| H | 11.95380100 | -2.19098800 | 1.37091800  |
| H | 12.38073100 | 0.41193100  | 2.05347100  |
| C | -9.54376500 | -0.08849500 | 0.45954500  |

|   |              |             |            |
|---|--------------|-------------|------------|
| C | -10.06931800 | -1.37284900 | 0.39033400 |
| N | -10.61029900 | 0.78399200  | 0.37208500 |
| C | -11.47930500 | -1.25909500 | 0.25188800 |
| H | -9.50177400  | -2.28990700 | 0.47942900 |
| C | -11.78652100 | 0.08492800  | 0.24066300 |
| H | -10.51458400 | 1.78620400  | 0.31310500 |
| H | -12.18956200 | -2.07177500 | 0.18251700 |
| H | -12.73322500 | 0.59776300  | 0.15269900 |

***Specie 9b. 7Py-NO<sub>3</sub><sup>-</sup> complex***

|   |             |             |             |
|---|-------------|-------------|-------------|
| C | -1.13183500 | -0.69156600 | -0.23132700 |
| C | -0.72285600 | -2.02445900 | -0.14221700 |
| C | 0.68519000  | -2.04121600 | -0.22913700 |
| C | 1.11340500  | -0.71820600 | -0.36673400 |
| N | -0.00448300 | 0.08135600  | -0.36322700 |
| H | 0.00182600  | 1.11507600  | -0.50460900 |
| H | -1.36822000 | -2.88357200 | -0.00375100 |
| H | 1.31933500  | -2.91932400 | -0.21330300 |
| C | 2.45540800  | -0.19376400 | -0.49118400 |
| C | 2.93851900  | 1.07595600  | -0.79992600 |
| N | 3.55482200  | -1.01039100 | -0.29657100 |
| C | 4.35114200  | 1.01171200  | -0.76970200 |
| H | 2.31866600  | 1.93530900  | -1.02900100 |
| C | 4.72520300  | -0.28889600 | -0.44444000 |
| H | 3.50773300  | -1.93582500 | 0.10026300  |
| H | 5.02993900  | 1.82119900  | -1.00838400 |
| C | -2.46055000 | -0.12412500 | -0.19317000 |
| C | -2.90275700 | 1.18575900  | -0.02027500 |
| N | -3.58244500 | -0.92099500 | -0.31518300 |
| C | -4.31607500 | 1.15840600  | -0.03592200 |
| H | -2.26066900 | 2.04988300  | 0.11970900  |

|   |              |             |             |
|---|--------------|-------------|-------------|
| C | -4.73097400  | -0.15913600 | -0.21776500 |
| H | -3.56436400  | -1.92220100 | -0.42804300 |
| H | -4.96903800  | 2.01892900  | 0.04384200  |
| C | -6.04545400  | -0.74340300 | -0.30701900 |
| C | -6.48961300  | -1.96944700 | -0.79792300 |
| N | -7.16378100  | -0.07544600 | 0.15027800  |
| C | -7.89486400  | -2.02957800 | -0.61755300 |
| H | -5.87229500  | -2.71329200 | -1.28430500 |
| C | -8.30135800  | -0.84322600 | -0.01996300 |
| H | -7.12517700  | 0.77389200  | 0.69317100  |
| H | -8.55141200  | -2.82506000 | -0.94750700 |
| C | 6.02051500   | -0.89576200 | -0.26826700 |
| C | 6.43727700   | -2.22476900 | -0.29617300 |
| N | 7.14358000   | -0.13633600 | -0.00776700 |
| C | 7.83145600   | -2.25061000 | -0.03766200 |
| H | 5.81077500   | -3.07357300 | -0.53661800 |
| C | 8.25757300   | -0.94118800 | 0.14626100  |
| H | 7.11296800   | 0.84517200  | 0.22373100  |
| H | 8.47098600   | -3.12447600 | -0.04890900 |
| N | 0.11175300   | 3.69280300  | -0.17817300 |
| O | -0.77674600  | 3.59113400  | 0.70359300  |
| O | 0.25840800   | 2.74367400  | -1.03472900 |
| O | 0.85021900   | 4.69204200  | -0.24846000 |
| C | -9.60695900  | -0.37638200 | 0.39034300  |
| C | -10.12534200 | 0.90107700  | 0.56686300  |
| N | -10.62318900 | -1.26161600 | 0.69360300  |
| C | -11.47701800 | 0.76884500  | 0.99126700  |
| H | -9.59902900  | 1.82465500  | 0.36523500  |
| C | -11.75946200 | -0.57808400 | 1.06453600  |
| H | -10.49504200 | -2.26052300 | 0.74089700  |

|   |              |             |             |
|---|--------------|-------------|-------------|
| H | -12.16823000 | 1.57348300  | 1.20461100  |
| H | -12.66146600 | -1.10397100 | 1.34248700  |
| C | 9.56193000   | -0.39142400 | 0.44168400  |
| C | 10.11863700  | 0.86046000  | 0.20769100  |
| N | 10.53247900  | -1.14486900 | 1.07311800  |
| C | 11.44619700  | 0.85029900  | 0.71944700  |
| H | 9.63428800   | 1.67439900  | -0.31539300 |
| C | 11.67647500  | -0.39980600 | 1.25190400  |
| H | 10.36610400  | -2.06670700 | 1.44597700  |
| H | 12.15664300  | 1.66573600  | 0.68726700  |
| H | 12.54661600  | -0.82035400 | 1.73502800  |

***Specie 10a. 9Py oligomers***

|   |             |            |             |
|---|-------------|------------|-------------|
| C | 1.14022900  | 1.88400400 | -0.53213200 |
| C | 0.71165800  | 1.90874200 | -1.85480200 |
| C | -0.70496300 | 1.90420600 | -1.85341500 |
| C | -1.13078900 | 1.87667700 | -0.52992300 |
| N | 0.00550200  | 1.87473000 | 0.25473000  |
| H | 0.00704800  | 1.69961000 | 1.24830300  |
| H | 1.35278800  | 1.98492500 | -2.72311900 |
| H | -1.34823900 | 1.97618600 | -2.72050300 |
| C | 2.46319400  | 1.86912200 | 0.04563000  |
| C | 2.92709100  | 2.25079800 | 1.29968700  |
| N | 3.55861700  | 1.42003500 | -0.66529100 |
| C | 4.32346700  | 2.01489000 | 1.33736800  |
| H | 2.33152800  | 2.70770500 | 2.07901700  |
| C | 4.70166900  | 1.49075800 | 0.10600900  |
| H | 3.50024900  | 0.93587600 | -1.54848900 |
| H | 4.99417600  | 2.25728900 | 2.15119800  |
| C | -2.45247300 | 1.85307300 | 0.05046500  |
| C | -2.91592600 | 2.22959500 | 1.30625500  |

|   |              |             |             |
|---|--------------|-------------|-------------|
| N | -3.54671900  | 1.39888800  | -0.65899400 |
| C | -4.31077600  | 1.98514800  | 1.34654600  |
| H | -2.32144600  | 2.68857800  | 2.08519500  |
| C | -4.68843800  | 1.46115300  | 0.11503000  |
| H | -3.48737300  | 0.91601400  | -1.54284200 |
| H | -4.98124200  | 2.22187100  | 2.16223500  |
| C | -5.97049600  | 1.02857300  | -0.38852800 |
| C | -6.45692900  | 0.89741100  | -1.68434200 |
| N | -6.99087700  | 0.64888600  | 0.46093600  |
| C | -7.78896200  | 0.42143400  | -1.60273700 |
| H | -5.92822800  | 1.17474600  | -2.58676200 |
| C | -8.10548300  | 0.26475700  | -0.25788000 |
| H | -6.87340500  | 0.49090100  | 1.45040900  |
| H | -8.46554200  | 0.26634800  | -2.43299400 |
| C | 5.98516600   | 1.06511600  | -0.39955300 |
| C | 6.46732000   | 0.92807200  | -1.69652500 |
| N | 7.01229000   | 0.70025000  | 0.44837200  |
| C | 7.80348500   | 0.46364100  | -1.61734000 |
| H | 5.93228600   | 1.19397700  | -2.59868400 |
| C | 8.12697200   | 0.32067600  | -0.27258500 |
| H | 6.90199200   | 0.55144300  | 1.44008000  |
| H | 8.47973700   | 0.30832000  | -2.44762100 |
| C | -9.30908100  | -0.18940600 | 0.39875400  |
| C | -9.79135100  | 0.02049800  | 1.68633800  |
| N | -10.24065400 | -0.97368700 | -0.25042600 |
| C | -11.03073900 | -0.65554500 | 1.80215400  |
| H | -9.31382200  | 0.62294900  | 2.44781500  |
| C | -11.29814300 | -1.26974500 | 0.58368300  |
| H | -10.16256900 | -1.28637300 | -1.20632200 |
| H | -11.64780200 | -0.71853700 | 2.68885300  |



|   |              |             |             |
|---|--------------|-------------|-------------|
| C | 9.33708700   | -0.11973200 | 0.38073400  |
| C | 9.83061900   | 0.11080000  | 1.65971900  |
| N | 10.26104100  | -0.91728600 | -0.26534500 |
| C | 11.06842000  | -0.56974700 | 1.77725800  |
| H | 9.37675200   | 0.75200000  | 2.40388900  |
| C | 11.31940500  | -1.21119900 | 0.57011600  |
| H | 10.09845700  | -1.37029400 | -1.15207400 |
| H | 11.73625200  | -0.54450800 | 2.62840600  |
| C | -12.40716300 | -2.08793700 | 0.14259400  |
| C | -12.50429300 | -3.05283000 | -0.85246000 |
| N | -13.65116400 | -2.00052000 | 0.73522300  |
| C | -13.83836700 | -3.54331600 | -0.85487300 |
| H | -11.69024500 | -3.39972600 | -1.47570300 |
| C | -14.52646600 | -2.87350700 | 0.13434600  |
| H | -13.89459000 | -1.31654500 | 1.43521000  |
| H | -14.24362200 | -4.31096000 | -1.49999700 |
| H | -15.55411200 | -2.94502100 | 0.45964300  |
| C | 12.41778500  | -2.04604000 | 0.13497700  |
| C | 12.91971600  | -2.32547200 | -1.13017800 |
| N | 13.19362100  | -2.74831400 | 1.03569400  |
| C | 14.01436700  | -3.21894400 | -0.97642700 |
| H | 12.56555500  | -1.89314900 | -2.05682900 |
| C | 14.16019000  | -3.46585200 | 0.37219600  |
| H | 13.00405900  | -2.79592900 | 2.02505700  |
| H | 14.63386200  | -3.62384600 | -1.76510300 |
| H | 14.86388100  | -4.08396500 | 0.91047100  |

***Specie 10b. 9Py-NO<sub>3</sub><sup>-</sup> complex***

|   |             |             |             |
|---|-------------|-------------|-------------|
| C | -1.12632500 | -0.26940900 | -0.62227100 |
| C | -0.72353100 | -1.59848300 | -0.77557100 |
| C | 0.68301900  | -1.60407000 | -0.88070100 |

|   |             |             |             |
|---|-------------|-------------|-------------|
| C | 1.11687900  | -0.27886600 | -0.78698000 |
| N | 0.00348100  | 0.51098000  | -0.62848300 |
| H | 0.01364600  | 1.55312700  | -0.57981300 |
| H | -1.37164800 | -2.46650200 | -0.78256900 |
| H | 1.31228600  | -2.47392900 | -1.02528900 |
| C | 2.45949300  | 0.25541000  | -0.83683100 |
| C | 2.94428700  | 1.56027600  | -0.90495600 |
| N | 3.55702300  | -0.58588700 | -0.82950600 |
| C | 4.35613700  | 1.48789300  | -0.92092700 |
| H | 2.32532500  | 2.44937400  | -0.94864500 |
| C | 4.72876500  | 0.14778400  | -0.86260800 |
| H | 3.51262100  | -1.57157000 | -0.62321500 |
| H | 5.03448800  | 2.32688700  | -1.01482300 |
| C | -2.45151500 | 0.28732900  | -0.47342500 |
| C | -2.88527600 | 1.54803900  | -0.06763500 |
| N | -3.57816000 | -0.46944700 | -0.72942200 |
| C | -4.29817500 | 1.53127400  | -0.08169800 |
| H | -2.23763800 | 2.36941600  | 0.22295100  |
| C | -4.72189600 | 0.26911500  | -0.49359700 |
| H | -3.56555200 | -1.43232800 | -1.02651500 |
| H | -4.94557400 | 2.36710200  | 0.15395900  |
| C | -6.03997700 | -0.28046300 | -0.68097700 |
| C | -6.49296800 | -1.40466900 | -1.37031600 |
| N | -7.15394200 | 0.31284300  | -0.12290900 |
| C | -7.89792800 | -1.48173400 | -1.20626900 |
| H | -5.88016700 | -2.06399200 | -1.97081600 |
| C | -8.29778300 | -0.40651000 | -0.42125500 |
| H | -7.10899700 | 1.06047800  | 0.55268900  |
| H | -8.55930700 | -2.20735600 | -1.66280000 |
| C | 6.02343500  | -0.48332300 | -0.83981800 |

|   |              |             |             |
|---|--------------|-------------|-------------|
| C | 6.43124700   | -1.78366000 | -1.13315500 |
| N | 7.15712500   | 0.21083100  | -0.46917600 |
| C | 7.82992400   | -1.86100700 | -0.92100400 |
| H | 5.79344500   | -2.56989200 | -1.51480800 |
| C | 8.27006200   | -0.61079600 | -0.50158400 |
| H | 7.13666900   | 1.13000700  | -0.05390800 |
| H | 8.46290500   | -2.71826400 | -1.11324400 |
| N | 0.15352600   | 4.00883500  | 0.25198100  |
| O | -0.74323500  | 3.75641800  | 1.09405000  |
| O | 0.27598300   | 3.25159000  | -0.78164000 |
| O | 0.92299100   | 4.97728600  | 0.38811300  |
| C | -9.59843700  | -0.00165700 | 0.05281900  |
| C | -10.08441400 | 1.22566000  | 0.49334500  |
| N | -10.64626600 | -0.89724800 | 0.14003300  |
| C | -11.44361200 | 1.05048500  | 0.85796000  |
| H | -9.53265000  | 2.15628600  | 0.49397000  |
| C | -11.77813800 | -0.27970200 | 0.63891200  |
| H | -10.54144900 | -1.89588400 | 0.04403900  |
| H | -12.12489100 | 1.82539300  | 1.18580800  |
| C | 9.58330900   | -0.13067100 | -0.14699700 |
| C | 10.12177300  | 1.15164300  | -0.10448900 |
| N | 10.58664200  | -0.99533500 | 0.24456000  |
| C | 11.46712700  | 1.04482500  | 0.33091900  |
| H | 9.61435300   | 2.05658900  | -0.41109400 |
| C | 11.74076100  | -0.29895500 | 0.55168700  |
| H | 10.43479900  | -1.96727400 | 0.46769000  |
| H | 12.18059500  | 1.85477900  | 0.41468500  |
| C | -13.01217800 | -1.00549400 | 0.84387900  |
| C | -13.52216100 | -2.15477800 | 0.25173100  |
| N | -13.94712100 | -0.58842300 | 1.77068700  |

|   |              |             |             |
|---|--------------|-------------|-------------|
| C | -14.78518200 | -2.42818500 | 0.84645200  |
| H | -13.05494500 | -2.70555400 | -0.55403600 |
| C | -15.02294600 | -1.44630600 | 1.78413400  |
| H | -13.79553400 | 0.17505000  | 2.41175800  |
| H | -15.45063500 | -3.24570600 | 0.60290100  |
| H | -15.85735200 | -1.28446000 | 2.45107800  |
| C | 12.93692100  | -0.97266700 | 1.00680100  |
| C | 13.39915900  | -2.27002000 | 0.82024300  |
| N | 13.87954300  | -0.32265200 | 1.77870100  |
| C | 14.64104300  | -2.39279100 | 1.50308500  |
| H | 12.91580000  | -3.02747400 | 0.21732600  |
| C | 14.91369100  | -1.17553400 | 2.08948200  |
| H | 13.75595200  | 0.60937700  | 2.14328400  |
| H | 15.27019900  | -3.27184600 | 1.54673000  |
| H | 15.74685200  | -0.84556300 | 2.69296300  |
